# INFOGRAPHICS IN ANESTHESIOLOGY

Complex Information for Anesthesiologists Presented Quickly and Clearly

## A Stress Test for the Brain: Sedation-induced Deficits

Midazolam can unmask flumazenil-reversible limb deficits assessed with a peg board motor task in patients with brain tumors.<sup>1</sup>

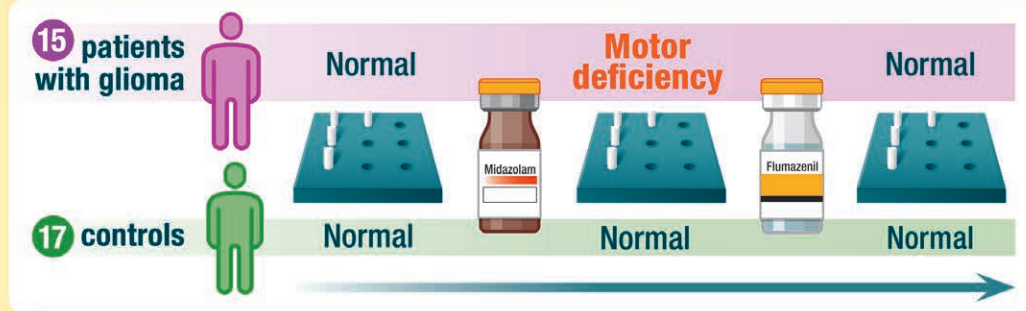

This approach might be used to assess neural vulnerability in a way that is similar to how risk is assessed for other organ systems.<sup>2</sup>

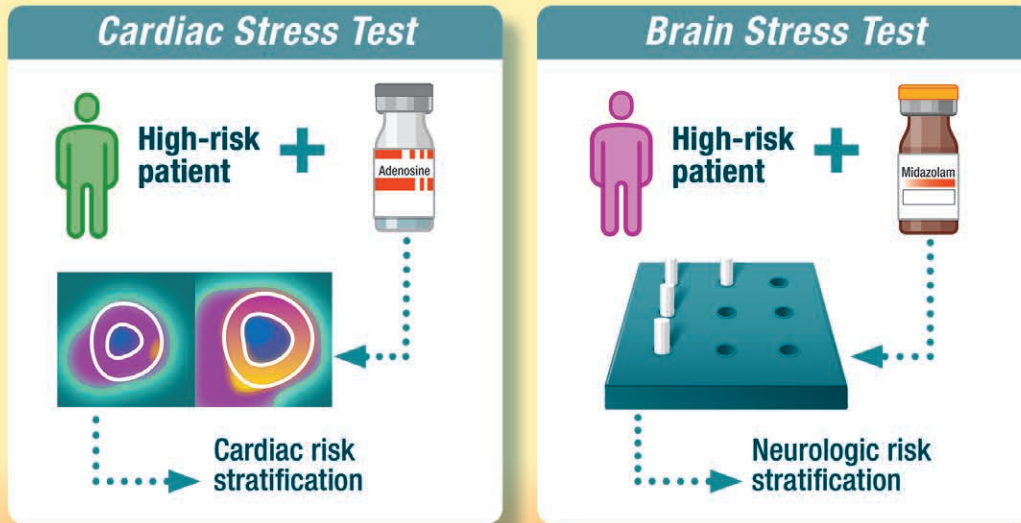

Cognitive reserve could potentially be assessed with this approach, which may lead to novel methods for detecting neurologic vulnerability.

Infographic created by Jonathan P. Wanderer, Vanderbilt University Medical Center, and James P. Rathmell, Brigham and Women's Health Care/Harvard Medical School. Illustration by Annemarie Johnson, Vivo Visuals. Address correspondence to Dr. Wanderer: jonathan.p.wanderer@vanderbilt.edu. This Infographic has a related article on p. 36 and a related editorial on p. 5.

1. Lin N, Han R, Hui X, Zhang K, Gelb AW: Midazolam sedation induces upper limb coordination deficits that are reversed by flumazenil in patients with eloquent area gliomas. *ANESTHESIOLOGY* 2019; 131:36–45
2. Vlissides PE, Mashour GA: Pharmacologic unmasking of neurologic deficits: A stress test for the brain. *ANESTHESIOLOGY* 2019; 131:5–6
